# Supplementary material for: Integration of IoT and Bioponics for Sustainable Urban Agriculture: Performance Evaluation of an Intelligent Hydroponic System for Lactuca sativa
Source: Research Square preprint supplement (doi:10.21203/rs.3.rs-8457375/v1), 2026-01-27
Supplement: Supplementary file 1 [file 17be156ef25cf8f31694ad9a.docx]

**Supplementary material**

**
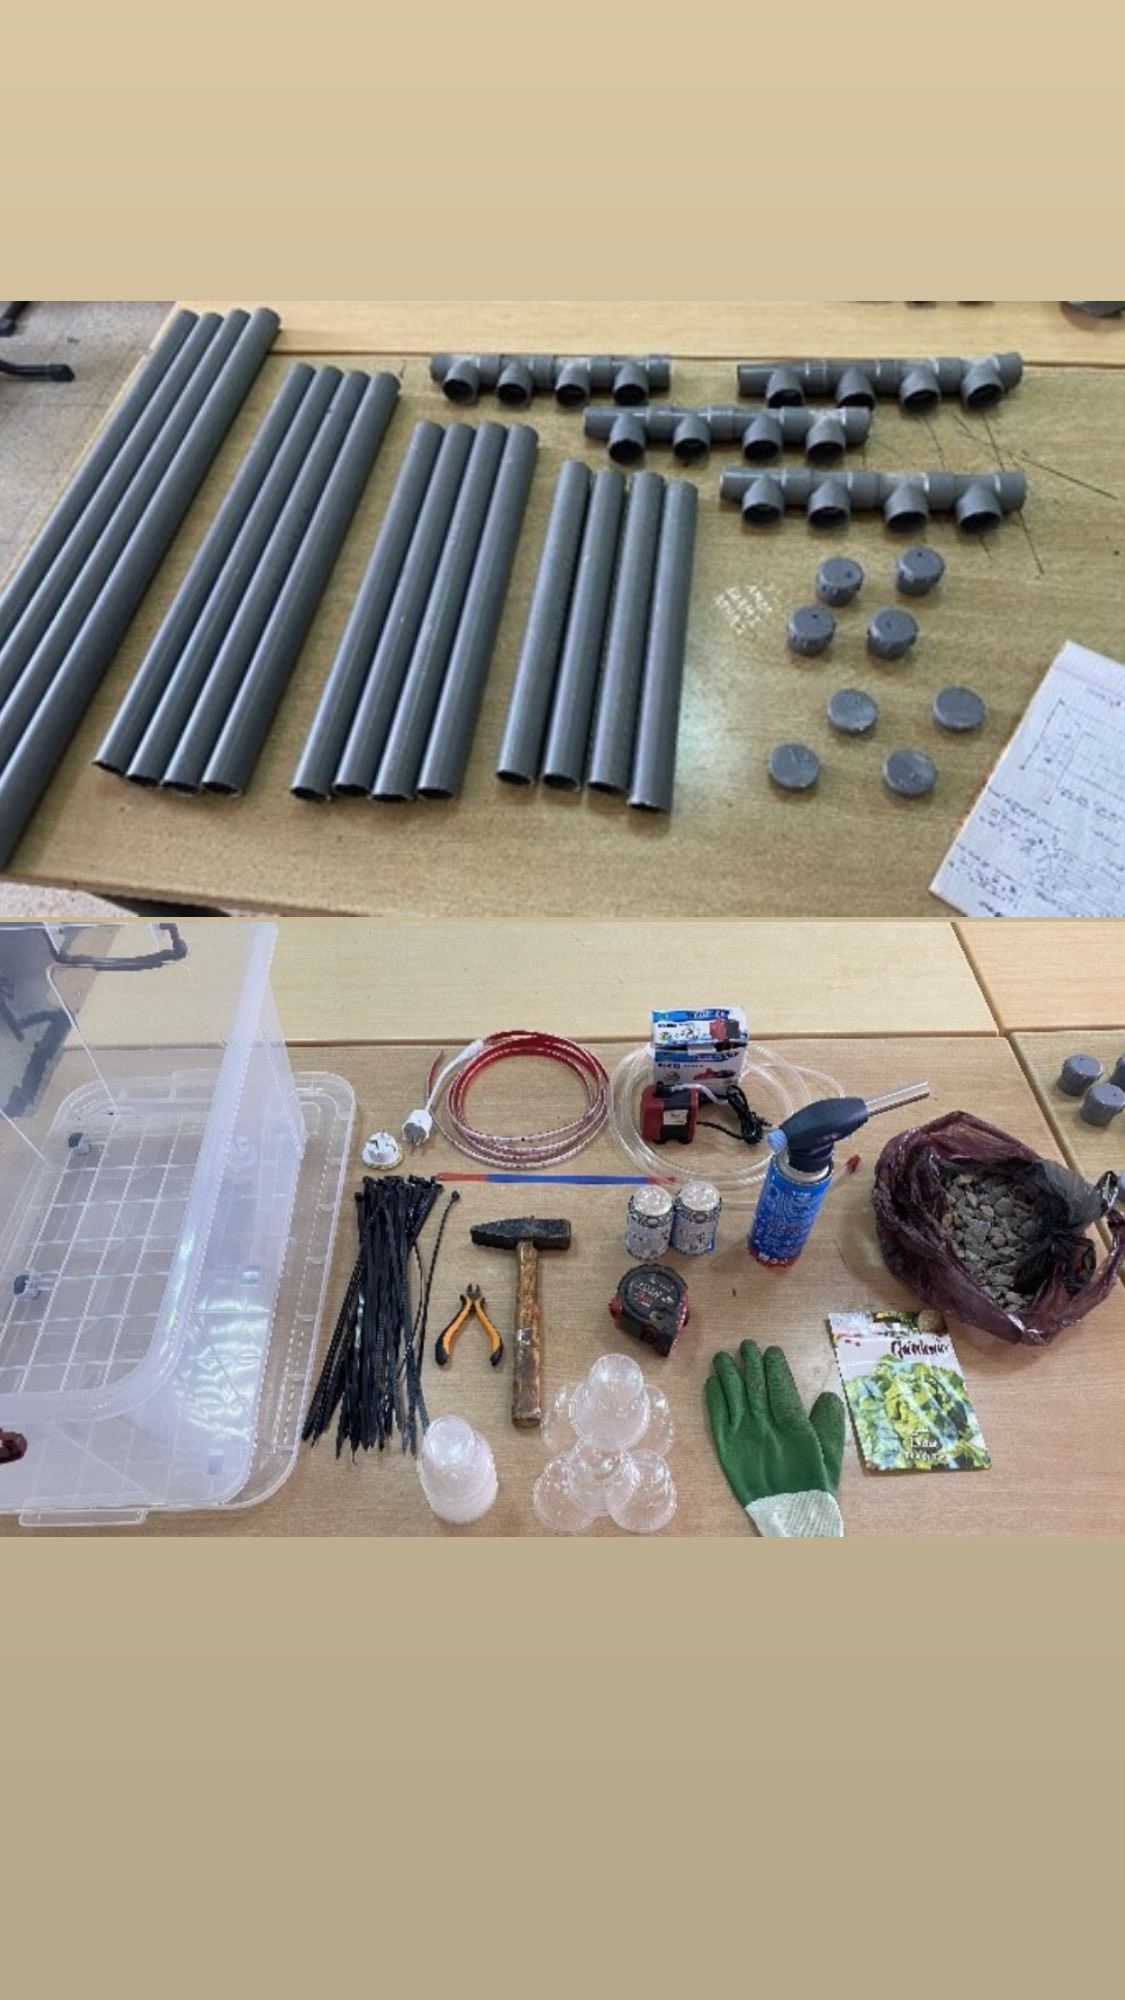
**

**Supplementary figure S1.** Overview of materials used in the intelligent hydroponic system.

A- PVC tubes and connectors forming the vertical cultivation channels, including pipe diameters and lengths.

B- Essential elements for the hydroponic system design and operation.

**
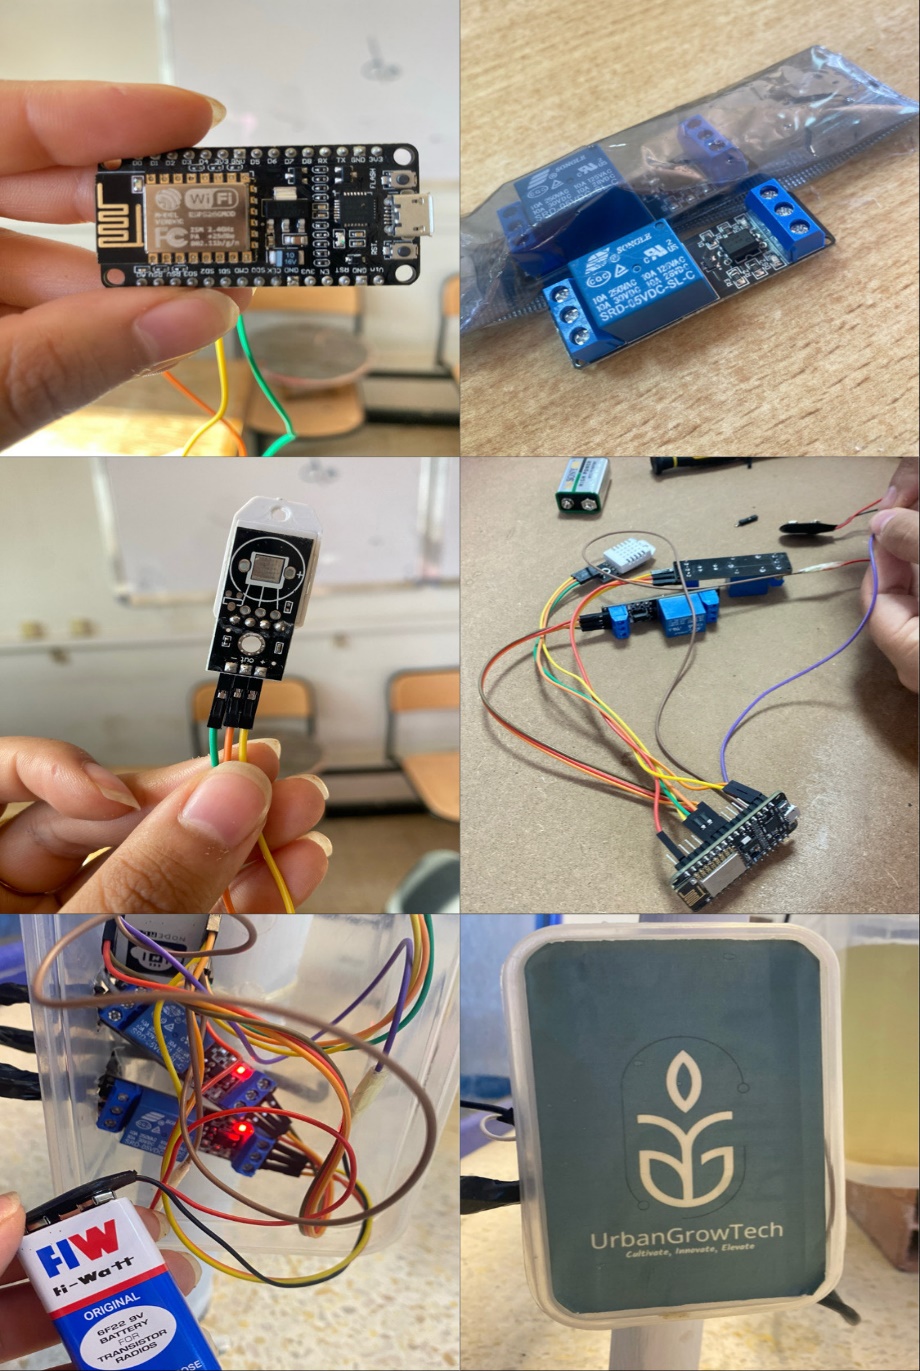
**

**Supplementary figure S2.** Iot components used for environmental monitoring and system automation.

1. Microcontroller ESP8266.
2. Relay 5v to controlthe irrigation pump and lighting.
3. DHT22 sensors for air temperature and relative humidity.
4. The conception of the IoT components.
5. Open view of the IoT control box, showing the microcontroller (ESP8266), sensors, and wiring connected to the system.
6. Closed view of the IoT control box, illustrating the protective enclosure and overall integration with the hydroponic setup.

**
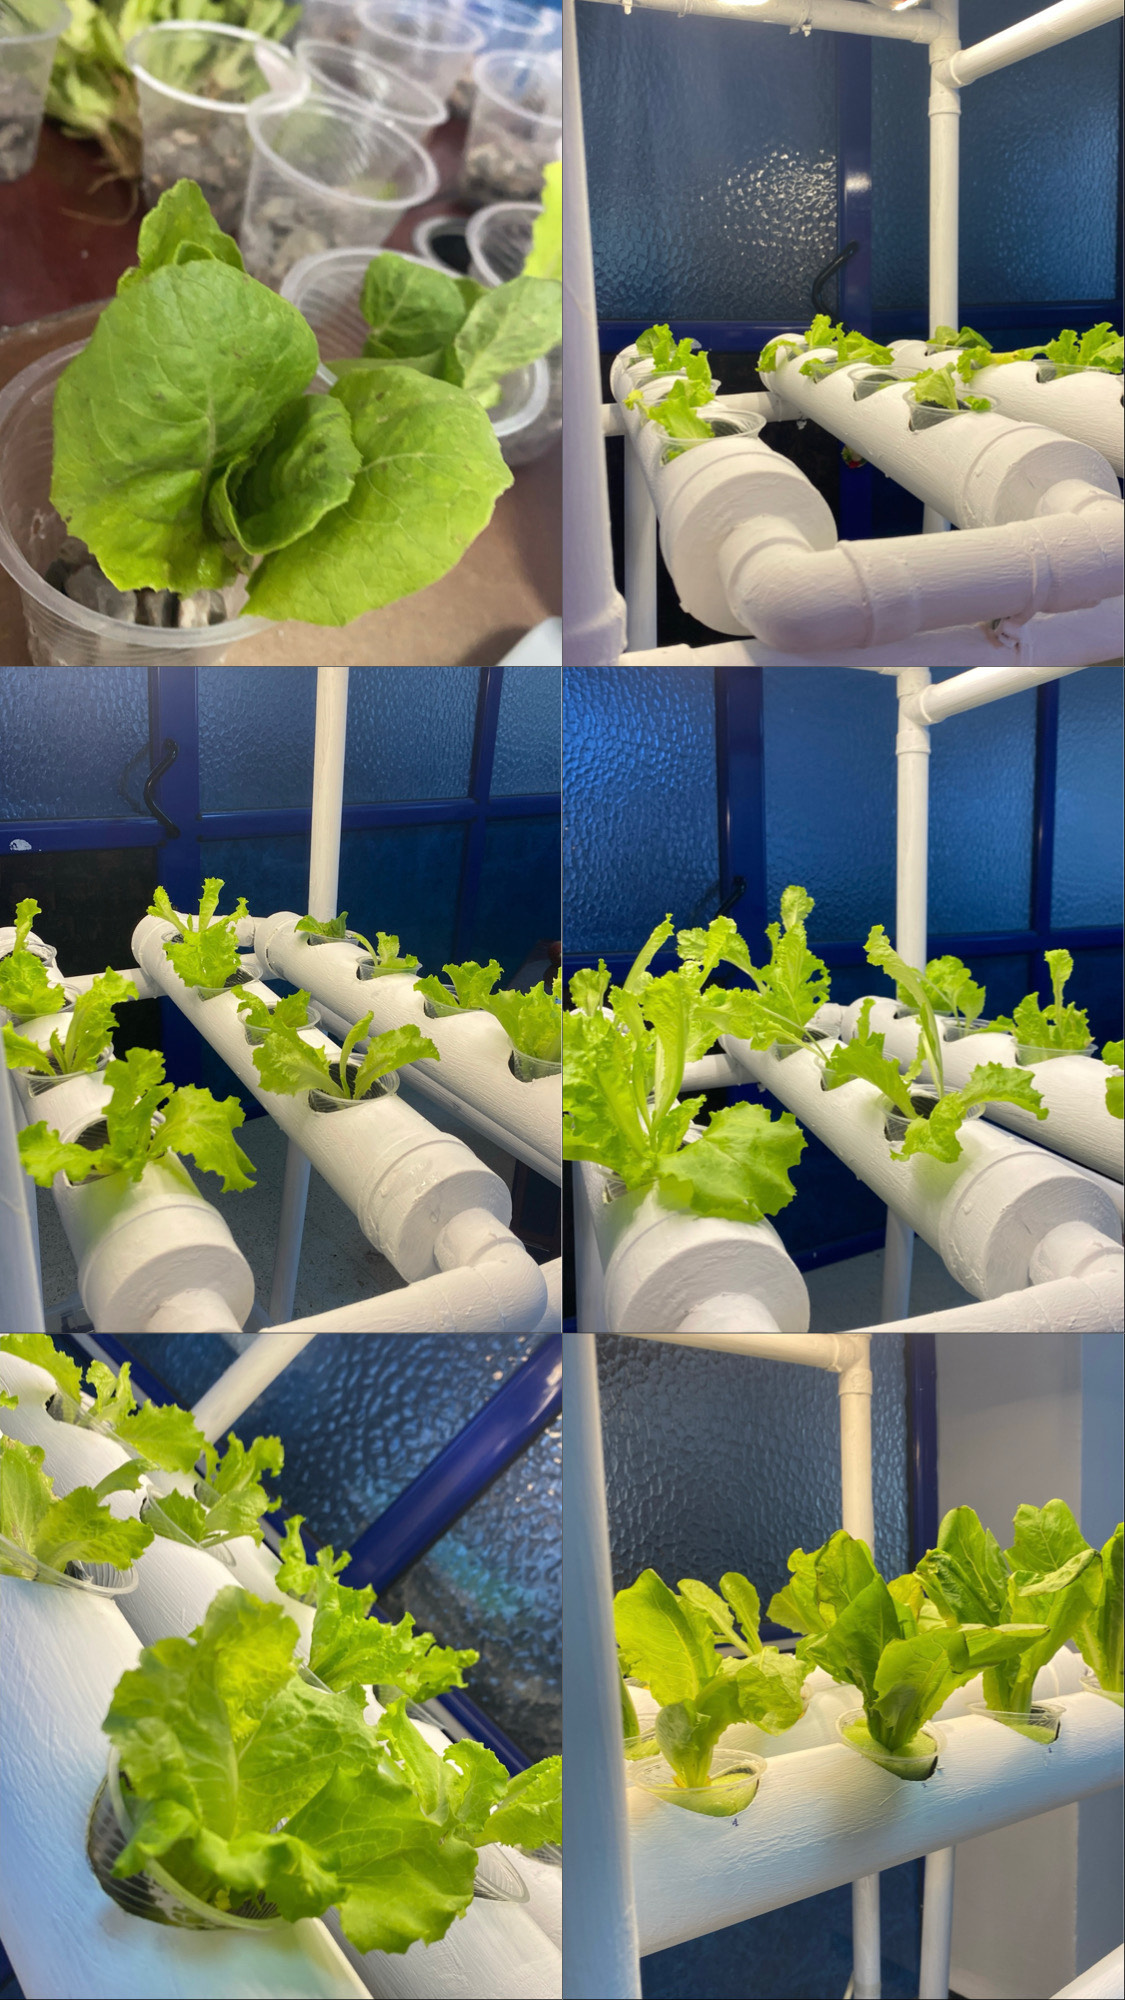
**

08/10/2024

09/10/2024

23/10/2024

15/10/2024

04/11/2024

11/11/2024

**Supplementary figure S3.** Phenological stages of romaine lettuce development over the 35-day growth cycle.

1. Transplanting.
2. 2-3 leaf stage
3. 4-5 leaf stage.
4. 8 leaf stage.
5. Vegetative growth.
6. Swelling stage.
